# Supplementary material for: Identification of Novel Pathogenicity Loci in Clostridium perfringens Strains That Cause Avian Necrotic Enteritis
Source: PubMed Central journal article supplement (PMC2879425; doi:10.1371/journal.pone.0010795), 2010-05-24
Supplement: pone.0010795.s001.pdf [file pone.0010795.s001.pdf]

CP4 draft genome assembly

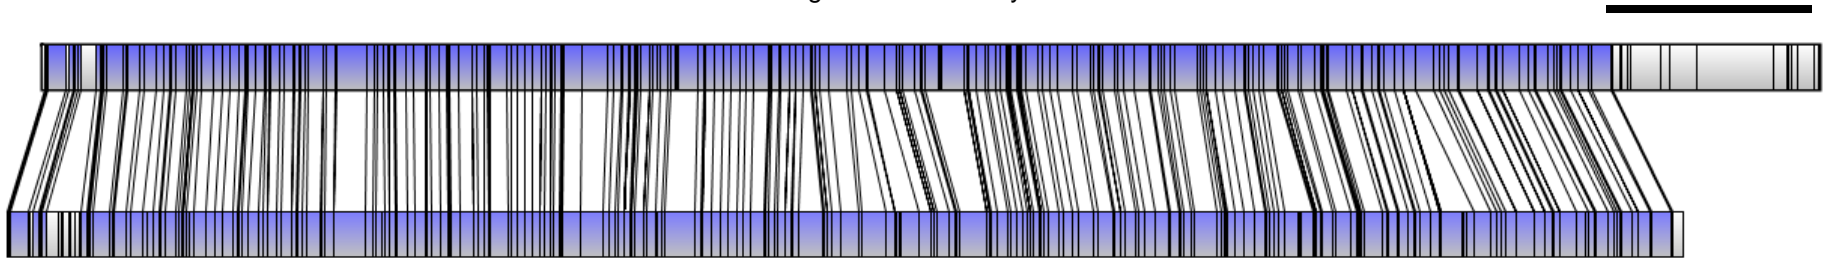

CP4 chromosomal optical map
