# Supplementary material for: Identification of Novel Pathogenicity Loci in Clostridium perfringens Strains That Cause Avian Necrotic Enteritis
Source: PubMed Central journal article supplement (PMC2879425; doi:10.1371/journal.pone.0010795), 2010-05-24

**A**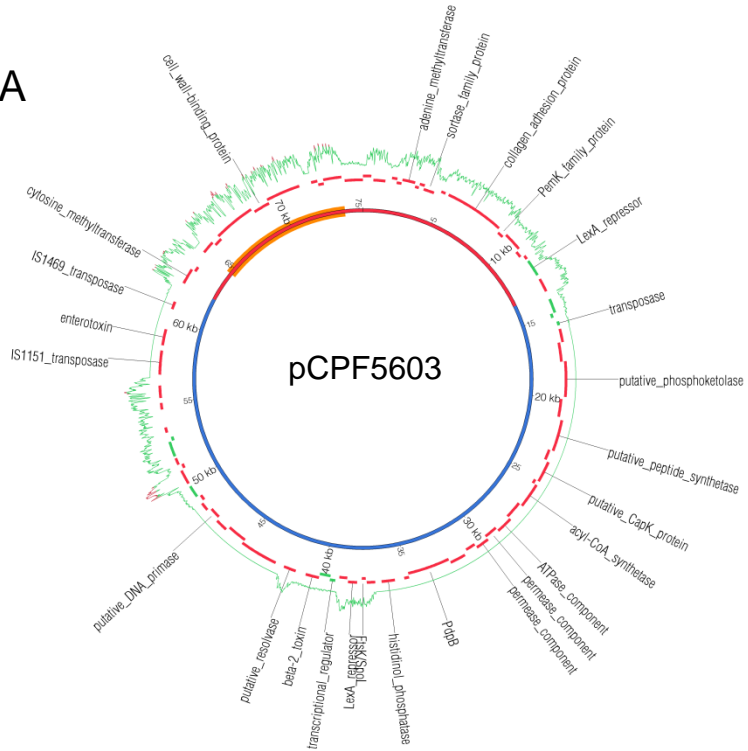**B**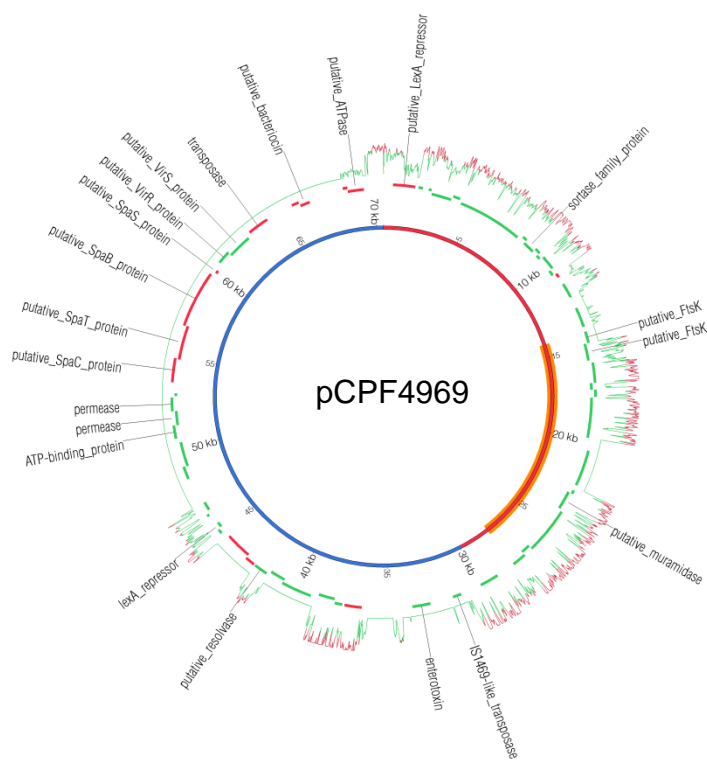**C**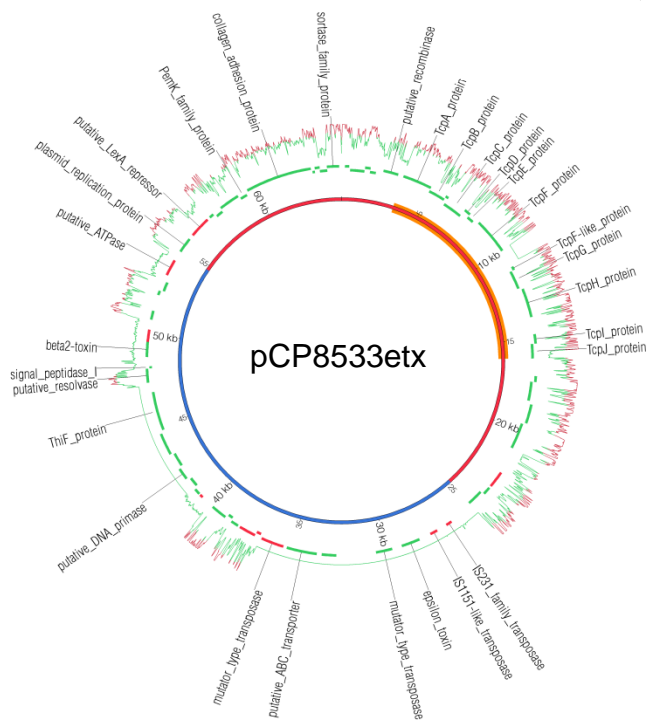

Supplement: pone.0010795.s003.pdf [file pone.0010795.s003.pdf]
