# Supplementary material for: Identification of Novel Pathogenicity Loci in Clostridium perfringens Strains That Cause Avian Necrotic Enteritis
Source: PubMed Central journal article supplement (PMC2879425; doi:10.1371/journal.pone.0010795), 2010-05-24
Supplement: pone.0010795.s004.pdf [file pone.0010795.s004.pdf]

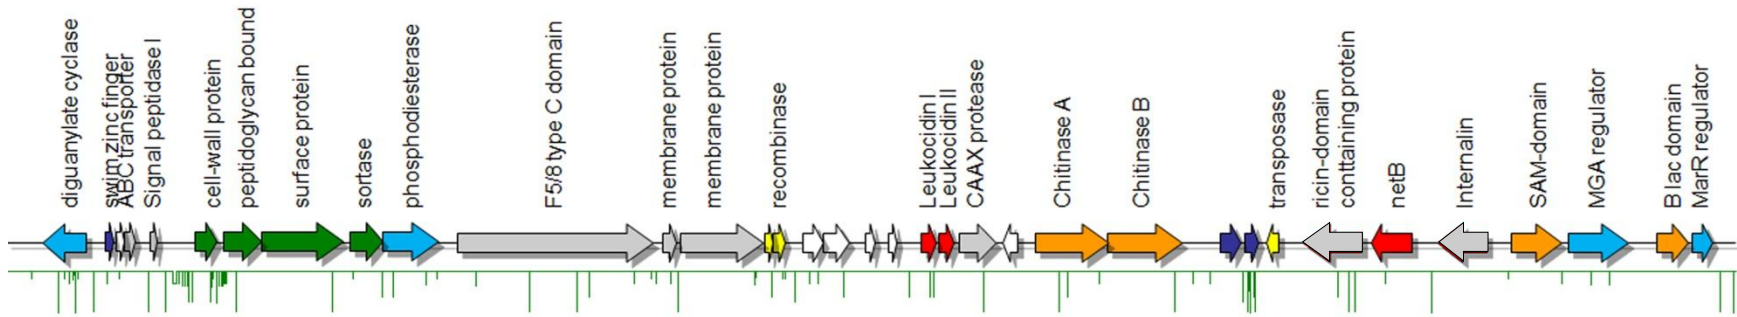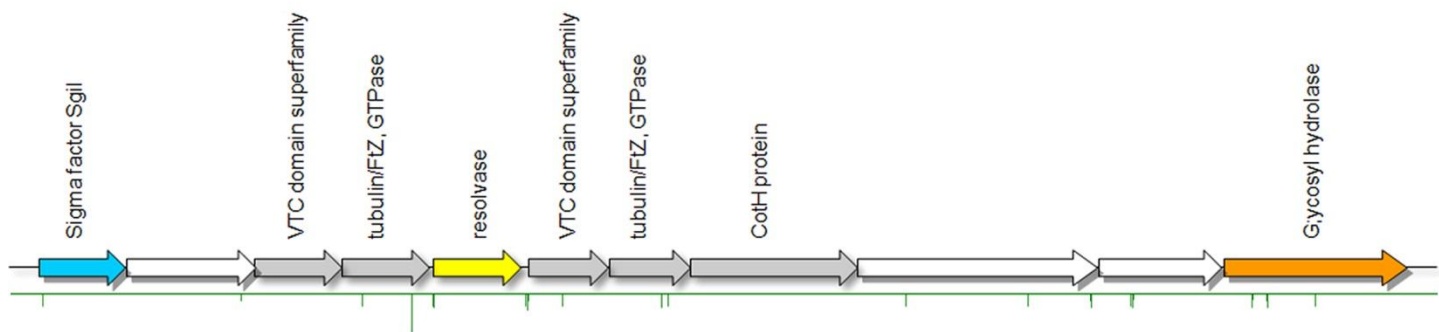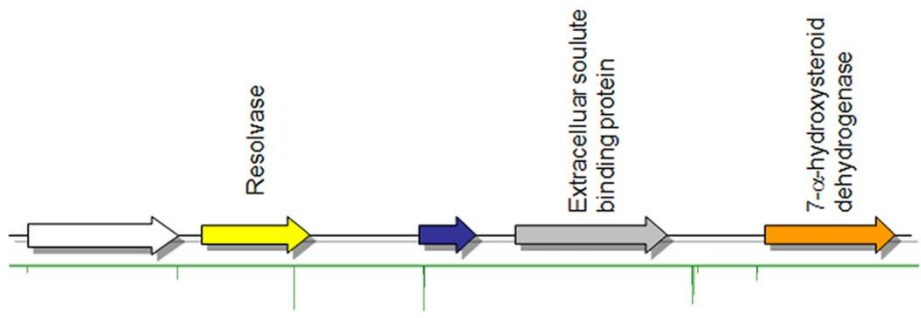

Putative role:

|   |                      |
|---|----------------------|
| ■ | Toxin                |
| ■ | Adhesion             |
| ■ | Regulation           |
| ■ | Mobilization         |
| ■ | Enzyme               |
| ■ | Other                |
| ■ | Plasmid              |
| □ | Hypothetical protein |
