# Supplementary material for: Identification of Novel Pathogenicity Loci in Clostridium perfringens Strains That Cause Avian Necrotic Enteritis
Source: PubMed Central journal article supplement (PMC2879425; doi:10.1371/journal.pone.0010795), 2010-05-24
Supplement: pone.0010795.s007.pdf [file pone.0010795.s007.pdf]

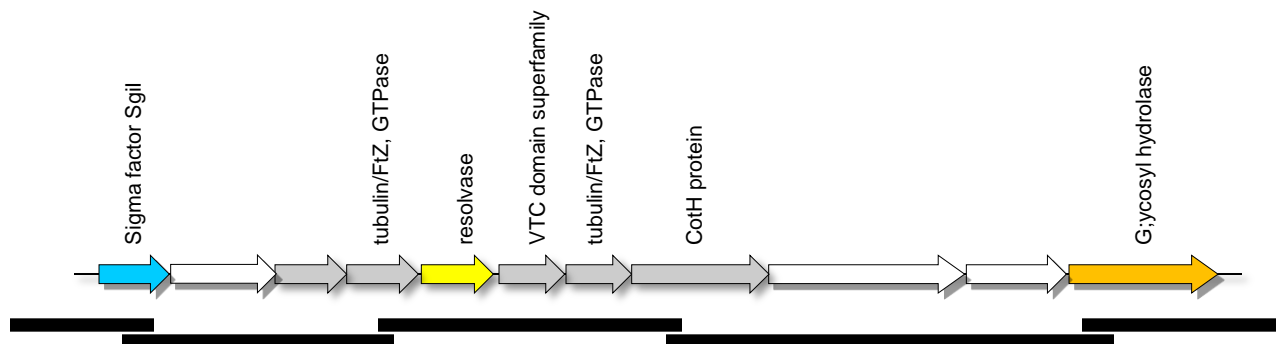

| Rxn No. | NEL2-link 5'<br>(928 bp) | NEL2-1<br>(2392 bp) | NEL2-2<br>(3037 bp) | NEL2-3<br>(4089 bp) | NEL2-link 3'<br>(1914 bp) |
|---------|--------------------------|---------------------|---------------------|---------------------|---------------------------|
| JGS1651 | +                        | +                   | +                   | +                   | +                         |
| JGS5252 | +                        | +                   | +                   | +                   | +                         |
| JGS5621 | +                        | +                   | +                   | +                   | +                         |
| JGS1521 | +                        | +                   | +                   | +                   | +                         |
| JGS4143 | +                        | +                   | +                   | +                   | +                         |
| JGS4140 | +                        | +                   | +                   | +                   | +                         |
| CP4     | +                        | +                   | +                   | +                   | +                         |
| CP1     | +                        | +                   | +                   | +                   | +                         |
| CP2     | +                        | +                   | +                   | +                   | +                         |
| CP3     | +                        | +                   | +                   | +                   | +                         |
| CP6     | +                        | +                   | +                   | +                   | +                         |
| JGS1473 | -                        | -                   | -                   | -                   | -                         |
