# Supplementary material for: Identification of Novel Pathogenicity Loci in Clostridium perfringens Strains That Cause Avian Necrotic Enteritis
Source: PubMed Central journal article supplement (PMC2879425; doi:10.1371/journal.pone.0010795), 2010-05-24
Supplement: pone.0010795.s008.pdf [file pone.0010795.s008.pdf]

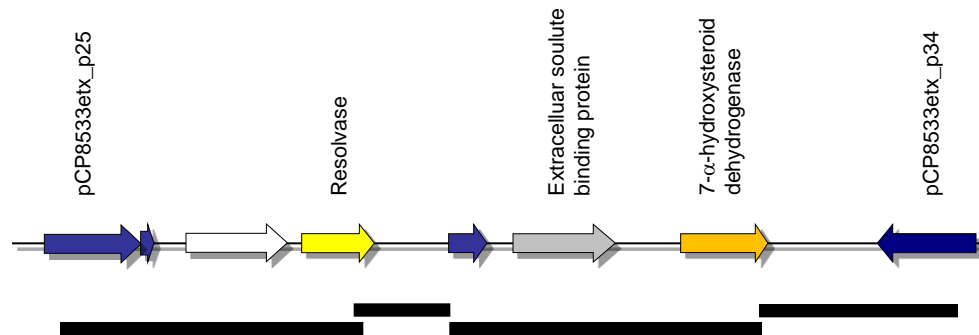

| Rxn No. | NEL3-1<br>(2.9 kb) | NEL3-2<br>(940 bp) | NEL3-3<br>(2.9 kb) | NEL3-4<br>(1.9 kb) |
|---------|--------------------|--------------------|--------------------|--------------------|
| JGS1651 | +                  | +                  | +                  | +                  |
| JGS5252 | +                  | +                  | +                  | +                  |
| JGS5621 | +                  | +                  | +                  | +                  |
| JGS1521 | +                  | +                  | +                  | +                  |
| JGS4143 | +                  | +                  | +                  | +                  |
| JGS4140 | +                  | +                  | +                  | +                  |
| CP4     | +                  | +                  | +                  | +                  |
| CP1     | +                  | +                  | +                  | +                  |
| CP2     | +                  | +                  | +                  | +                  |
| CP3     | +                  | +                  | +                  | +                  |
| CP6     | +                  | +                  | +                  | +                  |
| JGS1473 | -                  | -                  | -                  | -                  |
