# Supplementary material for: Identification of Novel Pathogenicity Loci in Clostridium perfringens Strains That Cause Avian Necrotic Enteritis
Source: PubMed Central journal article supplement (PMC2879425; doi:10.1371/journal.pone.0010795), 2010-05-24
Supplement: pone.0010795.s009.pdf [file pone.0010795.s009.pdf]

**Table S1. Primers used for PCR DIG labeling and sequencing,**

| <b>PCR Reaction</b>            | <b>Predict size (bp)</b> | <b>Primers</b>   | <b>Primer sequences (5'-3')</b>                         | <b>Reference</b>     |
|--------------------------------|--------------------------|------------------|---------------------------------------------------------|----------------------|
| DIG probe netB                 | 384                      | AKP78<br>AKP79   | GCTGGTGCTGGAATAAATGC<br>TCGCCATTGAGTAGTTTCCC            | Keyburn et al., 2008 |
| DIG probe hdhA                 | 387                      | HDHA-F<br>HDHA-R | CAATTGTTACTGCAGCTTCAAGAGG<br>TAATTTTTACCGCCACCTTCATAATA | This study           |
| Long Range PCR-5'<br>NEL_1     | 8503                     | SP-F<br>DCM-R    | GTGCAGTTACTATTATAGGACC<br>TTGAAGCACTAAGGATTATAGA        | This study           |
| Long Range PCR-3'<br>NEL_1     | 2677                     | BLAC-F<br>LEXA-F | AACTACTTAATAGACACAGGAA<br>TACAGGATCAGTATCATATACC        | This study           |
| <b>CP1</b> pcr product 4214 bp | 3000                     | WBRA-F<br>LKI-R  | GCAGATTCACCTCCTGTAACAA<br>CAGTTCATATGTATGTGTTGAC        | This study           |
