# Supplementary material for: Identification of Novel Pathogenicity Loci in Clostridium perfringens Strains That Cause Avian Necrotic Enteritis
Source: PubMed Central journal article supplement (PMC2879425; doi:10.1371/journal.pone.0010795), 2010-05-24
Supplement: pone.0010795.s010.pdf [file pone.0010795.s010.pdf]

**Table S2. Primers used for overlapping PCR analysis of NELoc-1, -2 and -3**

| PCR reaction | Predicted Size (bp) | Primers   | Primer sequences        |
|--------------|---------------------|-----------|-------------------------|
| NEL1-Link5'  | ~9000               | DCM-F     | GTGAATCCTACAAGTCTCCAGC  |
|              |                     | SIGP-F    | GTGCAGTTACTATTATAGGACC  |
| NEL1-1       | 3722                | SIGPROT-R | CCAATACTGCATGTTACTTCTA  |
|              |                     | 03749-R   | GTTGTTGTGTAATATATCTAGC  |
| NEL1-2       | 4482                | 03749-F   | GTATACTTCAGAAGGAACGGCT  |
|              |                     | SORTA-R   | TCTGCTTCACTAAGATCATTAT  |
| NEL1-3       | 2737                | SORTA-F   | TATTGTCAGCTCATAACAGGATT |
|              |                     | 1281-R1   | CTACTGTATTCCAAGCTGATCT  |
| NEL1-4       | 4869                | 1281-F1   | GGCTATACTTGTGCGATCATTAA |
|              |                     | 1281-R2   | ACTTCATCATCAGTTGCATCTT  |
| NEL1-5       | 5530                | 1281-F2   | CAAGTCTTGAAGAAGTTATAGC  |
|              |                     | WBRA-R    | AGCTTCACCACTACCAATTGAT  |
| NEL1-6       | 3000                | WBRA-F    | GCAGATTCACTTCTGTAAACAA  |
|              |                     | LKI-R     | CAGTTCATATGTATGTGTTGAC  |
| NEL1-7       | 3564                | LKII-F    | TTATTCCTTCTTCACTTGTTC   |
|              |                     | CHIA-R    | AAGGAGAAGCAGTAACAGCAGC  |
| NEL1-8       | 2224                | CHIA-F    | TGTTGGAGGTTGGACAGGAACA  |
|              |                     | CHIB-R    | CTCCAAGCTCCAGCCATATCAT  |
| NEL1-9       | 3942                | CHIB-F    | CAACAATAGCCGCAACTCCTTC  |
|              |                     | tn1546-R  | GAAGAACATTATACAGTCATAG  |
| NEL1-10      | 3118                | tn1546-F  | TTGTCTAGAGTAAGAAGCTAAT  |
|              |                     | AKP78     | GCTGGTGCTGGAATAAATGC    |
| NEL1-11      | 2760                | AKP79     | TCGCCATTGAGTAGTTTCCC    |
|              |                     | INTER-F   | CAACGTTAATAGTAGGTTCAAT  |
| NEL1-12      | 4087                | INTER-R   | TCTCTAATGGACTTATATCTTC  |
|              |                     | MPROT-R   | TCATTATTATATGCTAATCCAA  |
| NEL1-13      | 2926                | MPROT-F   | ATTGAATGGATGTATTATGCAG  |
|              |                     | MAR-R     | GTTATAATTGGAGTTAGTGTTT  |
| NEL1-Link3'  | 2.7                 | BLAC-F    | AACTACTTAATAGACACAGGAA  |
|              |                     | LEXA-F    | TACAGGATCAGTATCATATACC  |

|              |      |                             |                                                                            |
|--------------|------|-----------------------------|----------------------------------------------------------------------------|
| NEL2-Link 5' | 928  | 457-F<br>SigF-R             | AGTTGCTGTTATGCTAGATAGG<br>TGTAGTTACTTCTGAATCATGG                           |
| NEL2-1       | 2392 | SigF-F                      | TCCTAAGCATAGAGATAACAAGA                                                    |
|              |      | FtZ-R                       | TCTGTACTAATTCCATAAGCAC                                                     |
| NEL2-2       | 3037 | FtZ-F<br>CotH-R             | ACAACTGTGCTTATGGAATTAG<br>TTCTCCATTGGTGTCTATAACT                           |
| NEL2-3       | 4089 | CotH-F                      | TTGATAGGCTTATGGAAGACAA                                                     |
|              |      | Gh-R                        | GATATGTTGAAGCATTGATACC                                                     |
| NEL2-Link 3' | 1914 | Gh-F                        | AAGATCCAGAGGCCTATTAGAA                                                     |
| NEL3-Link5'  | 2.9  | 469-R<br>orf53-F1<br>res-R1 | TGCTGAAGCTACTAAGAATAGA<br>CCAACAACCTCCATAAAAGATG<br>GCAGTTAATTCTCCGTTTTTCC |
| NEL3-1       | 0.94 | 1852_R2                     | CATCCAAGGCTCATCACTCC                                                       |
|              |      | 1852-F2                     | GAAGTGCCATCTAATTTTGAAGAAA                                                  |
| NEL3-2       | 2.9  | 1852_F1<br>1852_R1          | GGAGTGATGAGCCTTGATG<br>AAGAGCAAATCCTCCAGCAA                                |
| NEL3-Link3'  | 1.9  | 5603_56-F1                  | TCCTACATGGACAATTGCTGA                                                      |
|              |      | 4143_3417-F1                | TTGCTGGAGGATTTGCTCTT                                                       |
